# Supplementary material for: Comparison of the GRUAN data products for Meisei RS-11G and Vaisala RS92-SGP radiosondes at Tateno (36.06° N, 140.13° E), Japan
Source: Copernicus journal article supplement (doi:10.5194/amt-2018-416), 2019-01-02
Supplement: Supplementary file 1 [file amt-2018-416-supplement.pdf]

## Supplements

Supplementary materials related to “Comparison of the GRUAN data products for Meisei RS-11G and Vaisala RS92-SGP radiosondes at Tateno (36.06°N, 140.13°E), Japan” by E. Kobayashi, S. Hoshino, M. Iwabuchi, T. Sugidachi, K. Shimizu and M. Fujiwara

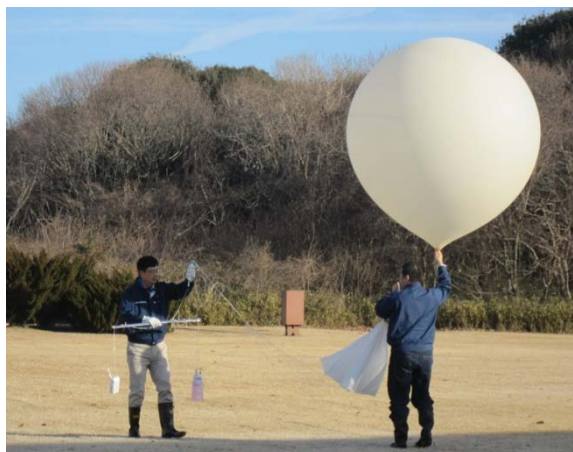

**Figure S1: Preparations for a flight launch at 8:30 local time on January 6, 2017. RS-11G and RS92 units were hung on the ends of a plastic/cardboard rod.**

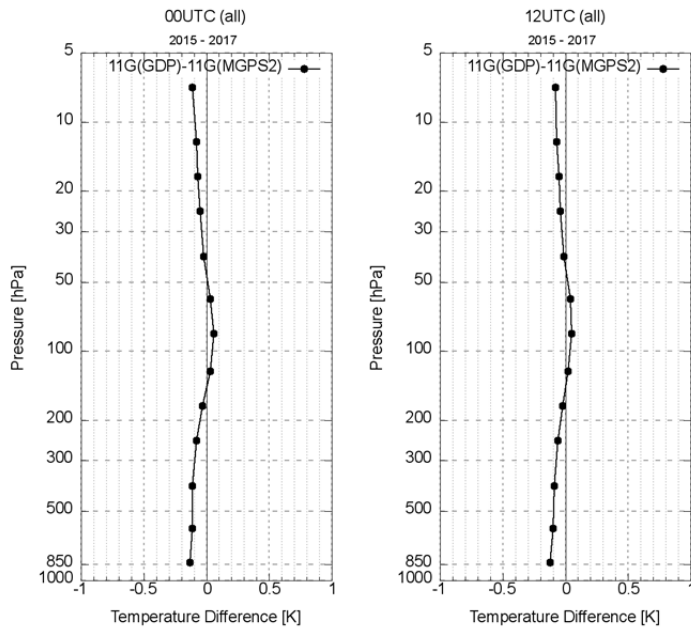

**Figure S2: Profiles of mean temperature differences (RS-11G GDP minus RS-11G MGPS2) for all measurement data. RS-11G MGPS2 is an RS-11G product based on Meisei MGPS2 software.**

Figure S2 shows temperature comparison results for RS-11G GDP and RS-11G products from Meisei MGPS2 (RS-11G MGPS2). Raw temperature data are corrected to help clarify the relationship between frequency and resistance for the thermistor, and correction for RS-11G GDP is improved to help clarify the relationship even more accurately than with RS-11G MGPS2 data.

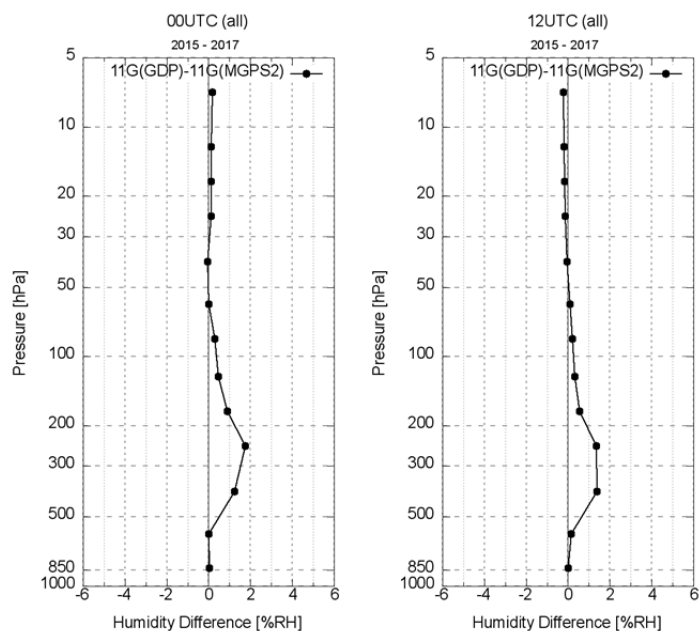

**Figure S3: As per Fig. S2, but for RH.**

Figure S3 shows RH comparison results for RS-11G GDP and RS-11G MGPS2. In RH calculation, the major difference between RS-11G GDP and RS-11G MGPS2 is the presence and absence of correction using SHC ground check data,

5 respectively, and the contamination removal filter for rain and cloud droplets is improved for RS-11G GDP.
